# Supplementary material for: A flexible and wide pressure range triboelectric sensor array for real-time pressure detection and distribution mapping
Source: Royal Society of Chemistry journal article supplement (doi:10.1039/d0ta08223f), 2020-01-01
Supplement: d0ta08223f1.pdf [file d0ta08223f1.pdf]

## Supporting Information

### **Flexible and wide pressure range triboelectric sensor array for real-time pressure detection and distribution mapping**

Dan Yang,<sup>‡ab</sup> Hengyu Guo,<sup>‡b</sup> Xiangyu Chen,<sup>c</sup> Longfei Wang,<sup>b</sup> Peng Jiang,<sup>b</sup> Weiqiang  
Zhang,<sup>b</sup> Liqun Zhang,<sup>d</sup> and Zhong Lin Wang<sup>\*bc</sup>

<sup>a</sup>Beijing Key Lab of Special Elastomeric Composite Materials, Department of Material  
Science and Engineering, Beijing Institute of Petrochemical Technology, Beijing  
102617, P. R. China

<sup>b</sup>School of Material Science and Engineering, Georgia Institute of Technology,  
Atlanta, GA 30332-0245, USA

<sup>c</sup>Beijing Key Laboratory of Micro-nano Energy and Sensor, Beijing Institute of  
Nanoenergy and Nanosystems, Chinese Academy of Sciences, Beijing 100083, P. R.  
China

<sup>d</sup>Department of Materials Science and Engineering, Beijing University of Chemical  
Technology, Beijing 100029, P. R. China

<sup>†</sup>Electronic supplementary information (ESI) available.

<sup>‡</sup>Co-authorship.

\*Corresponding author. E-mail: zhong.wang@mse.gatech.edu (Z. L. Wang).

**Table S1** Comparison of the performance of C-TENG with various advanced sensors.

| Sample                                             | Sensitivity                                                                                                                       | Measuring range               | Response time | Reference |
|----------------------------------------------------|-----------------------------------------------------------------------------------------------------------------------------------|-------------------------------|---------------|-----------|
| GO paper                                           | 17.2 kPa <sup>-1</sup>                                                                                                            | 0-20 kPa                      | 75 ms         | [1]       |
| Smart textiles                                     | 0.77 V Pa <sup>-1</sup>                                                                                                           | 0-14 kPa                      | 80 ms         | [2]       |
| Expandable microsphere                             | 150 mV Pa <sup>-1</sup>                                                                                                           | < 1 kPa                       | -             | [3]       |
| Convex microarrays                                 | 30.2 kPa <sup>-1</sup>                                                                                                            | < 1 MPa                       | 25 ms         | [4]       |
| CNT/hydrophobically                                | 0.127 kPa <sup>-1</sup>                                                                                                           | 0-50 kPa                      | 0.6 s         | [5]       |
| Human skin                                         | 0.29±0.02 V kPa <sup>-1</sup>                                                                                                     | <10 kPa                       | 0.1 s         | [6]       |
| Elastomer/ionic hydrogel                           | 0.013 kPa <sup>-1</sup>                                                                                                           | 1.3-70 kPa                    | -             | [7]       |
| PDMS/MCNT                                          | 0.51 V kPa <sup>-1</sup>                                                                                                          | 5-450 kPa                     | 0.45 s        | [8]       |
| Washable electronic textiles                       | 0.0479 kPa <sup>-1</sup> (<100 kPa)<br>0.0186 kPa <sup>-1</sup> (100-400 kPa)                                                     | <650 kPa                      | -             | [9]       |
| Trib-skins                                         | 0.29 kPa <sup>-1</sup>                                                                                                            | <25 kPa                       | -             | [10]      |
| Endocardial sensor                                 | 1.195 mV mmHg <sup>-1</sup>                                                                                                       | 0-350 mmHg                    | -             | [11]      |
| Hydrogel-based sensor                              | 0.05 kPa <sup>-1</sup>                                                                                                            | 0-3.27 kPa                    | 150 ms        | [12]      |
| MXene-textile                                      | 12.095 kPa <sup>-1</sup> (29-40 kPa)<br>3.844 kPa <sup>-1</sup> (< 29 kPa)                                                        | 0-40 kPa                      | 26 ms         | [13]      |
| Epidermis microstructure                           | 25.1 kPa <sup>-1</sup>                                                                                                            | 0-2.6 kPa                     | 120 ms        | [14]      |
| Core-shell nanofiber mats                          | 0.43 kPa <sup>-1</sup> (0.01-1.5 kPa)<br>0.068 V kPa <sup>-1</sup> (100-700 kPa)                                                  | 0.01-100 kPa                  | -             | [15]      |
| Weaving constructed sensor                         | 45.7 mV Pa <sup>-1</sup>                                                                                                          | 0-710 Pa                      | < 5 ms        | [16]      |
| PVDF-TrFE sponge                                   | 0.104 V kPa <sup>-1</sup> (0.05 to 5 kPa)<br>0.055 V kPa <sup>-1</sup> (5 to 60 kPa)<br>0.049 V kPa <sup>-1</sup> (60 to 600 kPa) | 0.05-600 kPa                  | < 5 ms        | [17]      |
| Silver nanowires/ PDMS electrode                   | 2.94±0.25 kPa <sup>-1</sup> (0-2 kPa)<br>0.75±0.06 kPa <sup>-1</sup> (2-6.7 kPa)                                                  | <6.7 kPa                      | <50 ms        | [18]      |
| Polyimide/CNT                                      | 11.28 kPa <sup>-1</sup>                                                                                                           | 0-61 kPa                      | 50 ms         | [19]      |
| PVDF-Ag/ethyl cellulose/conductive fabrics         | 1.67 V kPa <sup>-1</sup> (0 to 3 kPa)<br>0.2 V kPa <sup>-1</sup> (3 to 32 kPa)                                                    | 0-32 kPa                      | -             | [20]      |
| PVDF/carbon/PU electronic skin                     | 0.18 V kPa <sup>-1</sup>                                                                                                          | 0-175 kPa                     | -             | [21]      |
| ISTSA                                              | 0.063 V kPa <sup>-1</sup>                                                                                                         | 5-50 kPa                      | -             | [22]      |
| Wireless textile-based sensor                      | 3.88 V kPa <sup>-1</sup><br>0.54 V kPa <sup>-1</sup>                                                                              | 0.1-4.3 kPa<br>4.3-9.8 kPa    |               | [23]      |
| Self-Powered Electronic Skin                       | ~10 <sup>3</sup> kPa <sup>-1</sup>                                                                                                | 0.02-30 kPa                   | 8 ms          | [24]      |
| Shape-adaptive electronic skin                     | 10.89±0.5 mV kPa <sup>-1</sup>                                                                                                    | 80-230 kPa                    | -             | [25]      |
| Wearable, breathable, and washable sensing textile | 1.33 V kPa <sup>-1</sup><br>0.32 V kPa <sup>-1</sup>                                                                              | 1.95-3.13 kPa<br>3.2-4.61 kPa |               | [26]      |
| C-TENG                                             | 15.6 V MPa <sup>-1</sup>                                                                                                          | 0-1.1 MPa                     | 40 ms         | This work |

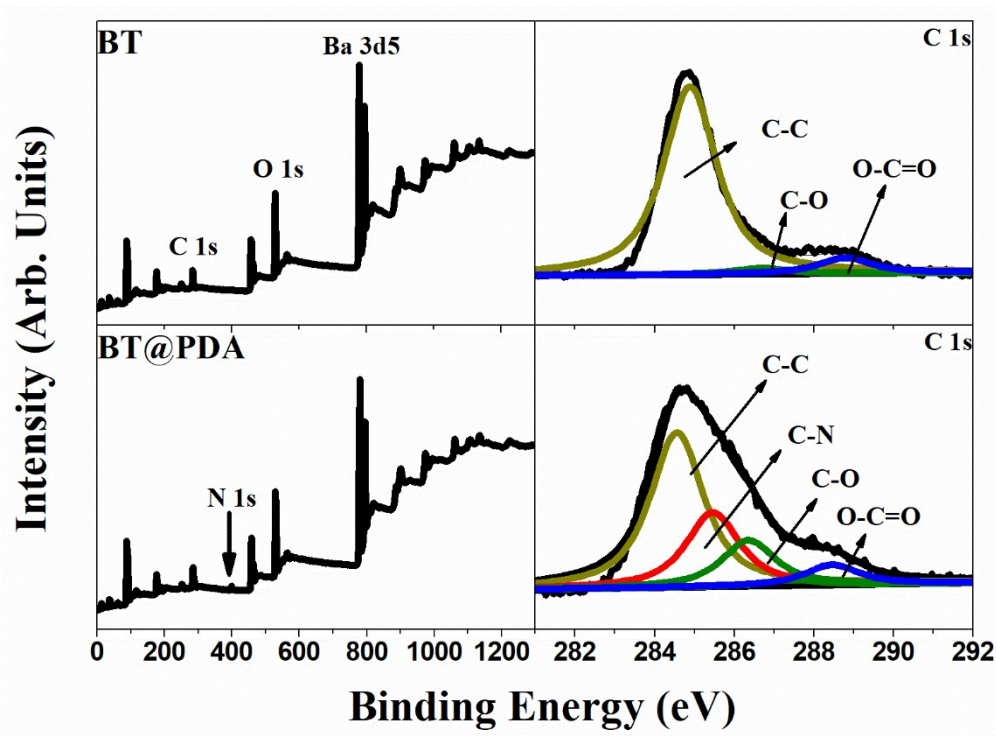

Fig. S1 XPS wide range and high-resolution C 1s spectrum of BT and BT@PDA nanoparticles.

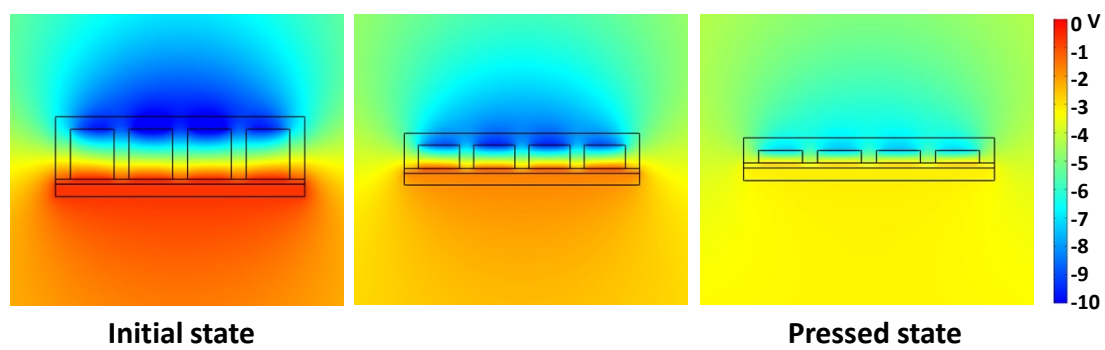

**Fig. S2** Numerically calculated potential distribution of C-TENG at different deformations by using COMSOL software.

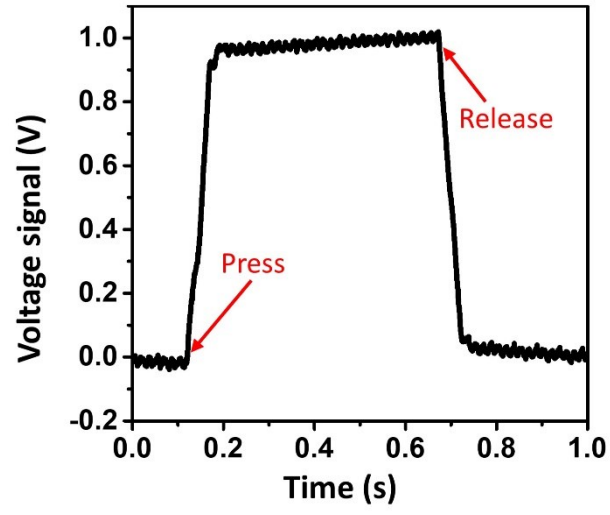

Fig. S3 Response time of a single C-TENG.

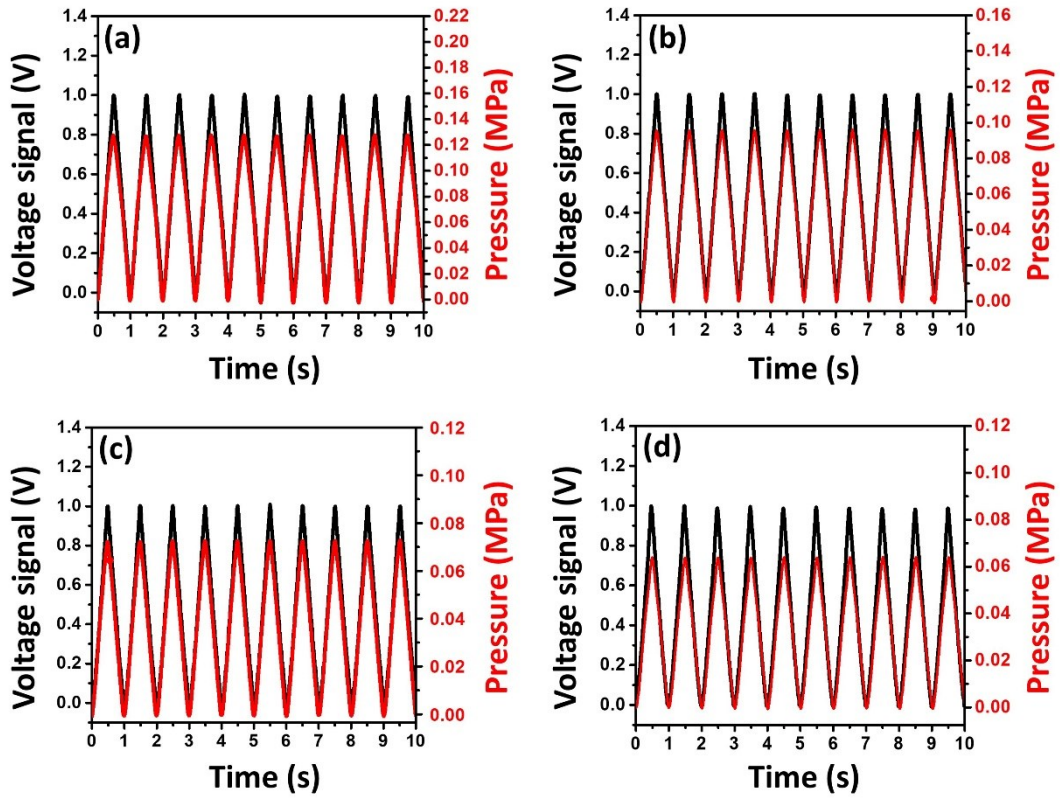

Fig. S4  $V_{oc}$  values of C-TENG with cuboids of (a) 9, (b) 16, (c) 25, and (d) 36 under different pressures.

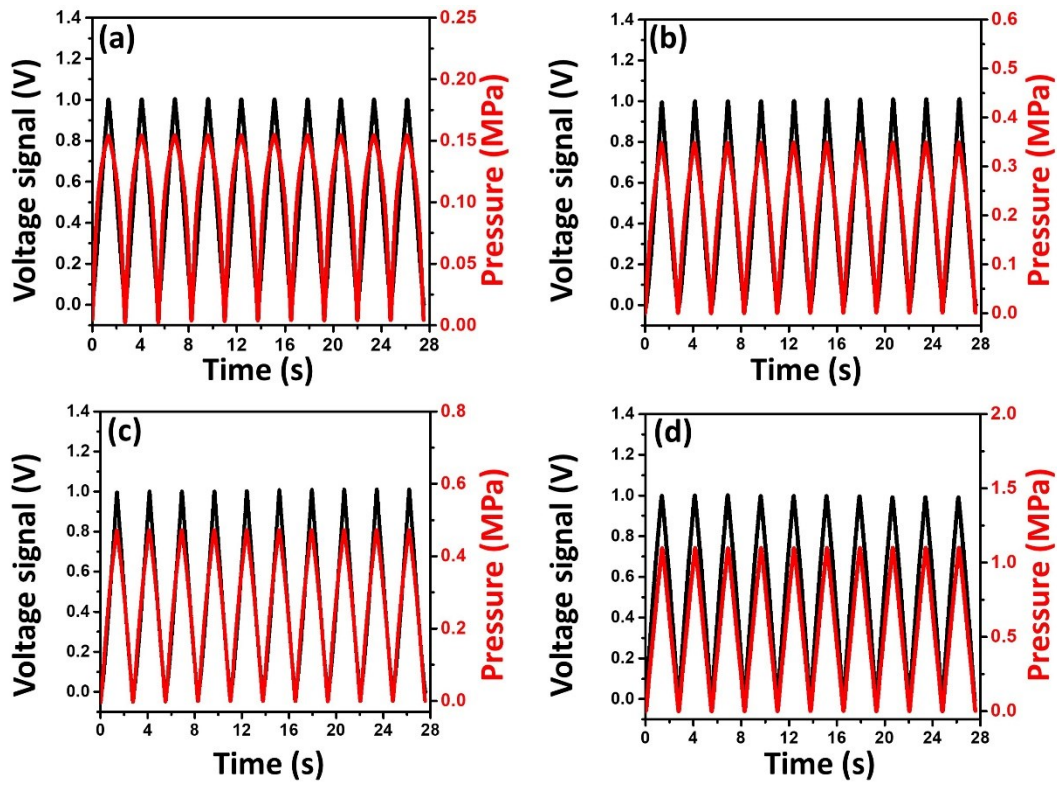

Fig.

S5  $V_{oc}$  values of C-TENG with different Young's moduli of (a) 0.09 MPa, (b) 0.55 MPa, (c) 0.94 MPa, and (d) 2.63 MPa as a function of the pressure.

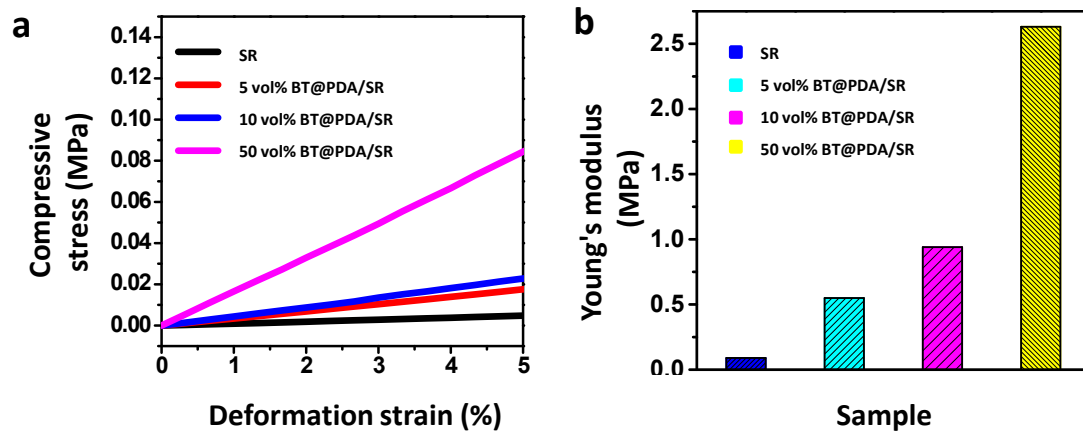

**Fig. S6** (a) Stress-strain curves with strain lower than 5% and (b) Young's modulus of SR composites filled with different contents of BT@PDA nanoparticles.



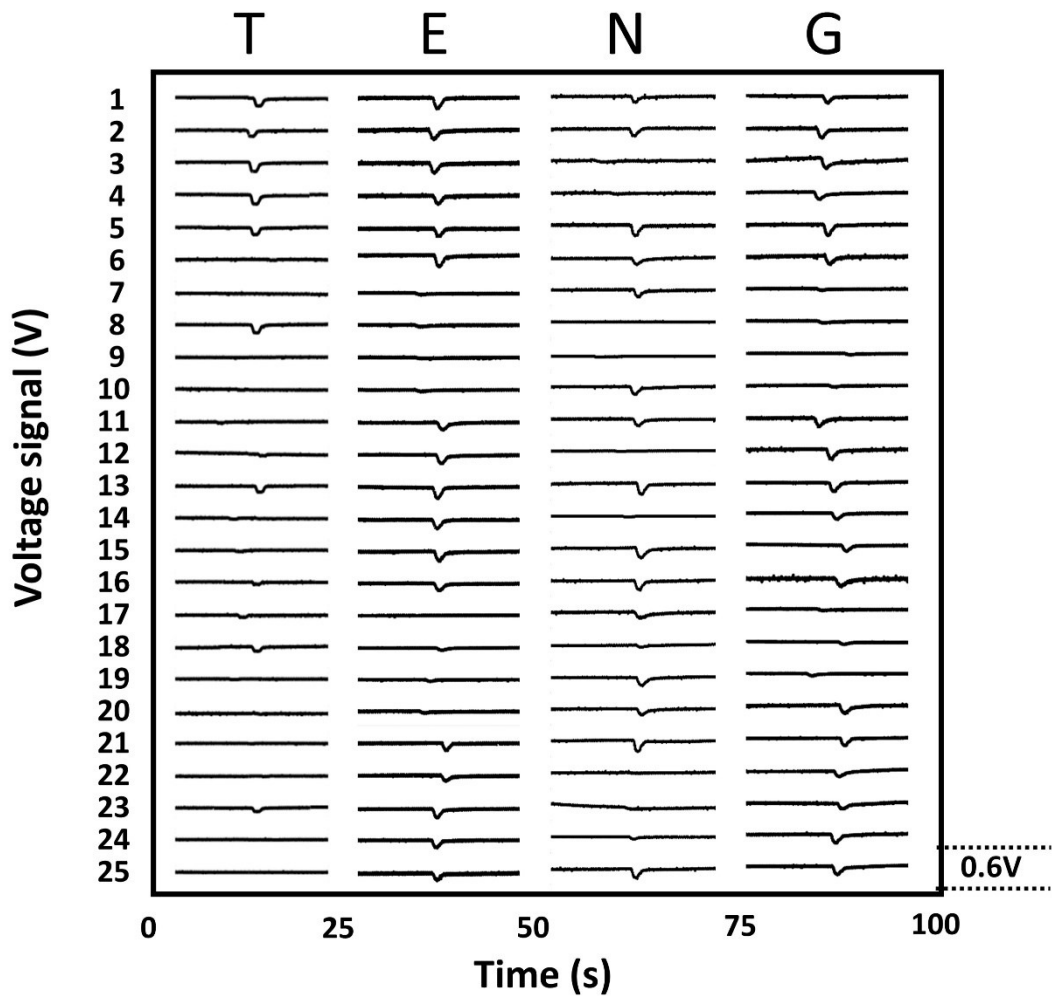

**Fig. S7** Measured output voltages of C-TENG with cuboids height of 3 mm under acrylic sheets with “T”, “E”, “N”, and “G” shape at deformation of 1.5 mm.

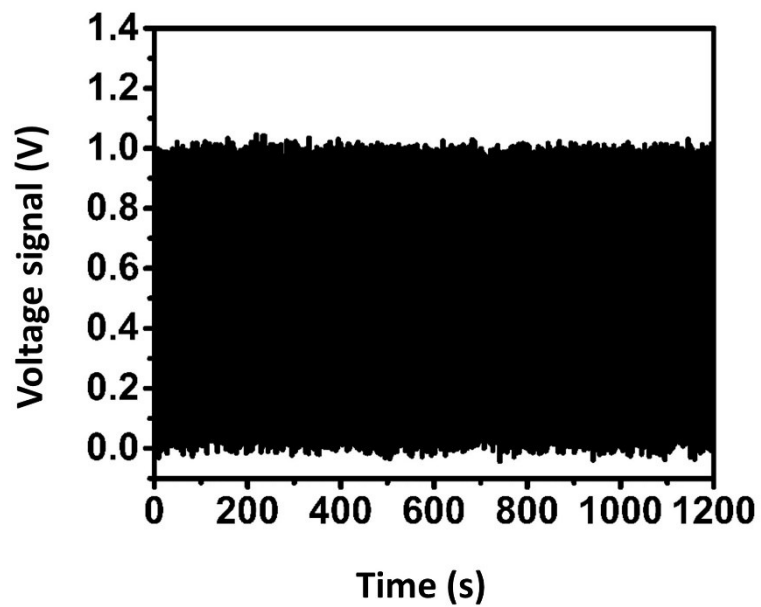

**Fig. S8** Stability and durability of the C-TENG under around 1200 s working time.

## Reference

- [1] L. Q. Tao, K. N. Zhang, H. Tian, Y. Liu, D. Y. Wang, Y. Q. Chen, Y. Yang, and T. L. Ren, *ACS Nano*, 2017, **11**, 8790.
- [2] Z. Lin, J. Yang, X. Li, Y. Wu, W. Wei, J. Liu, J. Chen, and J. Yang, *Adv. Funct. Mater.*, 2018, **28**, 1704112.
- [3] Z. Liu, Z. Zhao, X. Zeng, X. Fu, and Y. Hu, *Nano Energy*, 2019, **59**, 295.
- [4] Y. Xiong, Y. Shen, L. Tian, Y. Hu, P. Zhu, R. Sun, and C. P. Wong, *Nano Energy*, 2020, **70**, 104436.
- [5] Z. Qin, X. Sun, Q. Yu, H. Zhang, X. Wu, M. Yao, W. Liu, F. Yao, and J. Li, *ACS Appl. Mater. Interfaces*, 2020, **12**, 4944.
- [6] Y. Yang, H. Zhang, Z. H. Lin, Y. S. Zhou, Q. Jing, Y. Su, J. Yang, J. Chen, C. Hu, and Z. L. Wang, *ACS Nano*, 2013, **7**, 9213.
- [7] X. Pu, M. Liu, X. Chen, J. Sun, C. Du, Y. Zhang, J. Zhai, W. Hu, and Z. L. Wang, *Sci. Adv.*, 2017, **3**, e1700015.
- [8] M. S. Rasel, P. Maharjan, M. Salauddin, M. T. Rahman, H. O. Cho, J. W. Kim, and J. Y. Park, *Nano Energy*, 2018, **49**, 603.
- [9] R. Cao, X. Pu, X. Du, W. Yang, J. Wang, H. Guo, S. Zhao, Z. Yuan, C. Zhang, C. Li, and Z. L. Wang, *ACS Nano*, 2018, **12**, 5190.
- [10] Y. C. Lai, J. Deng, R. Liu, Y. C. Hsiao, S. L. Zhang, W. Peng, H. M. Wu, X. Wang, and Z. L. Wang, *Adv. Mater.*, 2018, **30**, 1801114.
- [11] Z. Liu, Y. Ma, H. Ouyang, B. Shi, N. Li, D. Jiang, F. Xie, D. Qu, Y. Zou, Y. Huang, H. Li, C. Zhao, P. Tan, M. Yu, Y. Fan, H. Zhang, Z. L. Wang, and Z. Li, *Adv. Funct. Mater.*, 2019, **29**, 1807560.
- [12] G. Ge, Y. Zhang, J. Shao, W. Wang, W. Si, W. Huang, and X. Dong, *Adv. Funct. Mater.*, 2018, **28**, 1802576.
- [13] T. Li, L. Chen, X. Yang, X. Chen, Z. Zhang, T. Zhao, X. Li, and J. Zhang, *J. Mater. Chem. C*, 2019, **7**, 1022.
- [14] Y. Pang, K. Zhang, Z. Yang, S. Jiang, Z. Ju, Y. Li, X. Wang, D. Wang, M. Jian, Y. Zhang, R. Liang, H. Tian, Y. Yang, and T. L. Ren, *ACS Nano*, 2018, **12**, 2346.

- [15] M. F. Lin, J. Xiong, J. Wang, K. Parida, and P. S. Lee, *Nano Energy*, 2018, **44**, 248.
- [16] K. Meng, J. Chen, X. Li, Y. Wu, W. Fan, Z. Zhou, Q. He, X. Wang, X. Fan, Y. Zhang, J. Yang, and Z. L. Wang, *Adv. Funct. Mater.*, 2019, **29**, 1806388.
- [17] K. Parida, V. Bhavanasi, V. Kumar, R. Bendi, and P. S. Lee, *Nano Res.*, 2017, **10**, 3557.
- [18] X. Shuai, P. Zhu, W. Zeng, Y. Hu, X. Liang, Y. Zhang, R. Sun, and C. P. Wong, *ACS Appl. Mater. Interfaces*, 2017, **9**, 26314.
- [19] X. Chen, H. Liu, Y. Zheng, Y. Zhai, X. Liu, C. Liu, L. Mi, Z. Guo, and C. Shen, *ACS Appl. Mater. Interfaces*, 2019, **11**, 42594.
- [20] M. Lou, I. Abdalla, M. Zhu, J. Yu, Z. Li and B. Ding, *ACS Appl. Mater. Interfaces*, 2020, **12**, 1597.
- [21] Z. Li, M. Zhu, J. Shen, Q. Qiu, J. Yu and B. Ding, *Adv. Funct. Mater.*, 2020, **30**, 1908411.
- [22] L. Wang, Y. Liu, Q. Liu, Y. Zhu, H. Wang, Z. Xie, X. Yu and Y. Zi, *Microsyst. Nanoeng.*, 2020, **6**, 59.
- [23] K. Meng, S. Zhao, Y. Zhou, Y. Wu, S. Zhang, Q. He, X. Wang, Z. Zhou, W. Fan, X. Tan, J. Yang and J. Chen, *Matter*, 2020, **2**, 896.
- [24] Q. J. Sun, X. H. Zhao, C. C. Yeung, Q. Tian, K. W. Kong, W. Wu, S. Venkatesh, W. J. Li and V. A. L. Roy, *ACS Appl. Mater. Interfaces*, 2020, **12**, 37239.
- [25] M. Zhu, M. Lou, I. Abdalla, J. Yu, Z. Li and B. Ding, *Nano Energy*, 2020, **69**, 102429.
- [26] M. N. Lou, I. Abdalla, M. M. Zhu, X. D. Wei, J. Y. Yu, Z. L. Li and B. Ding, *ACS Appl. Mater. Interfaces*, 2020, **12**, 19965.
